# Supplementary material for: Agricultural intensification was associated with crop diversification in India (1947-2014)
Source: PubMed Central journal article supplement (PMC6905533; doi:10.1371/journal.pone.0225555), 2019-12-11
Supplement: pone.0225555.s002.pdf [file pone.0225555.s002.pdf]

**S2 Table.** R-packages used in the study:

- Baptiste A (2017). gridExtra: Miscellaneous Functions for "Grid" Graphics. R package version 2.3.  
<https://CRAN.R-project.org/package=gridExtra>
- Bates D, Maechler M, Bolker B, Walker S (2015). Fitting Linear Mixed-Effects Models Using lme4. Journal of Statistical Software, 67(1), 1-48. doi:10.18637/jss.v067.i01.
- Breheny P, Burchett W (2017). Visualization of Regression Models Using visreg. The R Journal, 9: 56-71.
- Gu Z (2014) circlize implements and enhances circular visualization in R. Bioinformatics.
- Guy JA (2019). migest: Methods for the Indirect Estimation of Bilateral Migration. R package version 1.8.0. <https://CRAN.R-project.org/package=migest>
- Hijmans RJ (2019). raster: Geographic Data Analysis and Modeling. R package version 3.0-1.  
<https://CRAN.R-project.org/package=raster>
- Lemon, J (2006) Plotrix: a package in the red light district of R. R-News, 6(4): 8-12.
- Neuwirth E (2014). RColorBrewer: ColorBrewer Palettes. R package version 1.1-2.
- Pebesma EJ, Bivand RS (2005). Classes and methods for spatial data in R. R News 5(2), <https://cran.r-project.org/doc/Rnews/>.
- Wickham H (2017). tidyverse: Easily Install and Load the 'Tidyverse'. R package version 1.2.1.  
<https://CRAN.R-project.org/package=tidyverse>.
