# Supplementary material for: Agricultural intensification was associated with crop diversification in India (1947-2014)
Source: PubMed Central journal article supplement (PMC6905533; doi:10.1371/journal.pone.0225555), 2019-12-11
Supplement: pone.0225555.s003.pdf [file pone.0225555.s003.pdf]

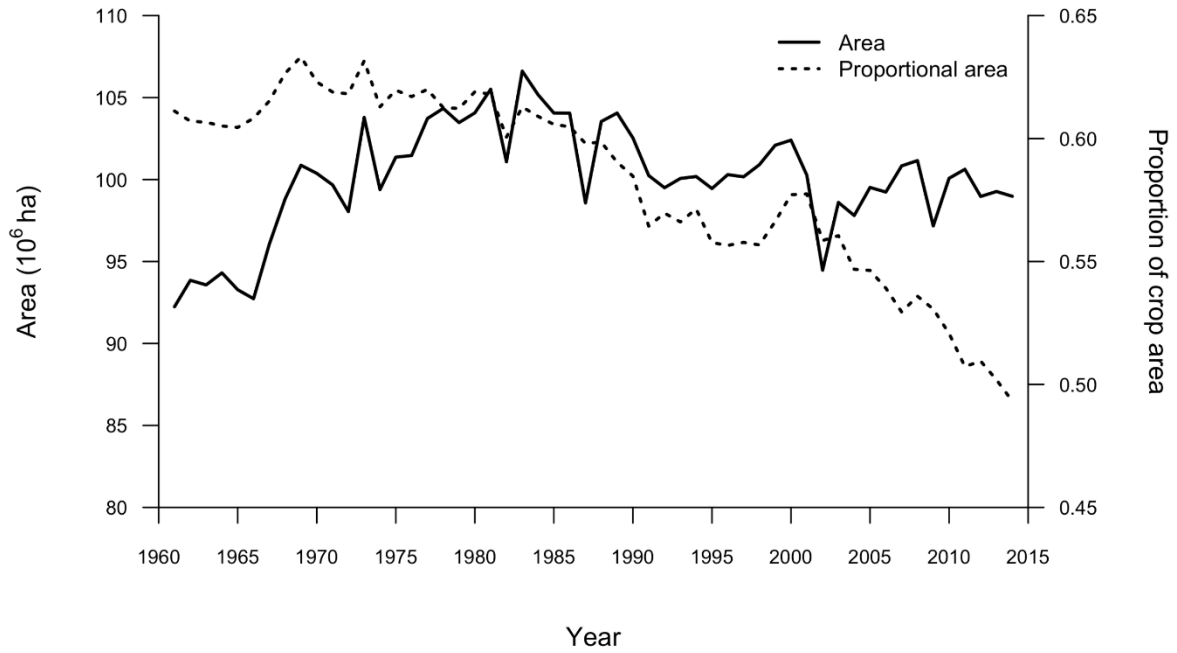

**S1 Fig.** Total cereal area and the proportion of total crop area planted to cereals in India from 1961 to 2014.
