# Supplementary material for: Agricultural intensification was associated with crop diversification in India (1947-2014)
Source: PubMed Central journal article supplement (PMC6905533; doi:10.1371/journal.pone.0225555), 2019-12-11
Supplement: pone.0225555.s004.pdf [file pone.0225555.s004.pdf]

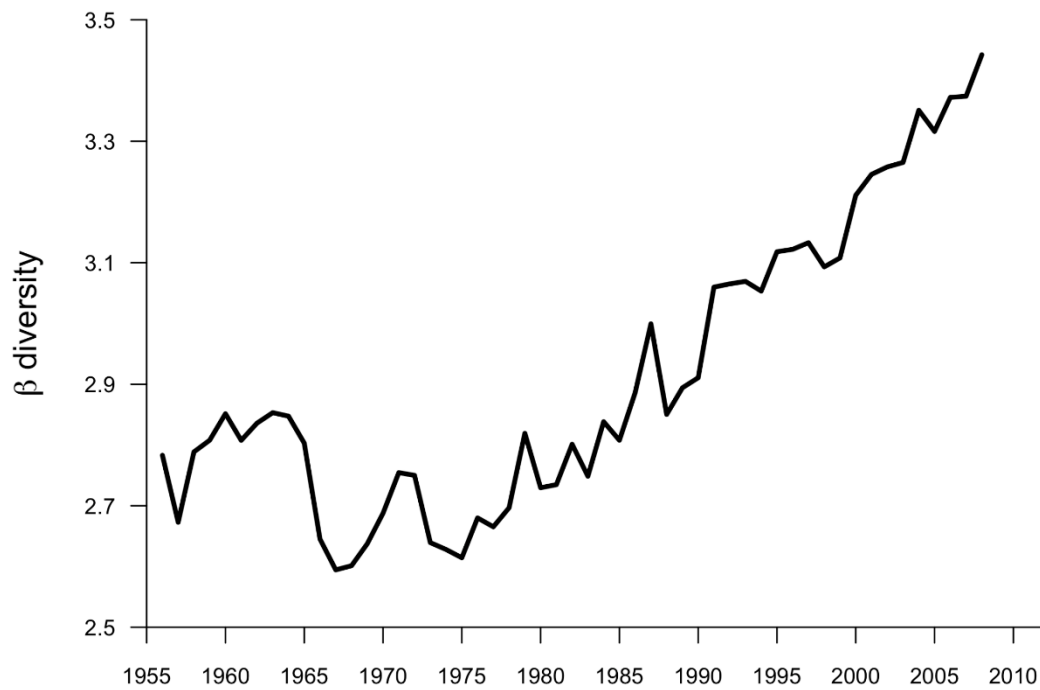

**S2 Fig.** Crop district-level  $\beta$ -diversity (turnover) in India between 1956 and 2008.  $\beta$ -diversity was calculated for each year by dividing country-level diversity ( $\gamma$ -diversity) by the mean district-level diversity ( $\alpha$ -diversity) for the same year: ( $\beta = \gamma/\alpha$ ).
