# Supplementary material for: Agricultural intensification was associated with crop diversification in India (1947-2014)
Source: PubMed Central journal article supplement (PMC6905533; doi:10.1371/journal.pone.0225555), 2019-12-11
Supplement: pone.0225555.s005.pdf [file pone.0225555.s005.pdf]

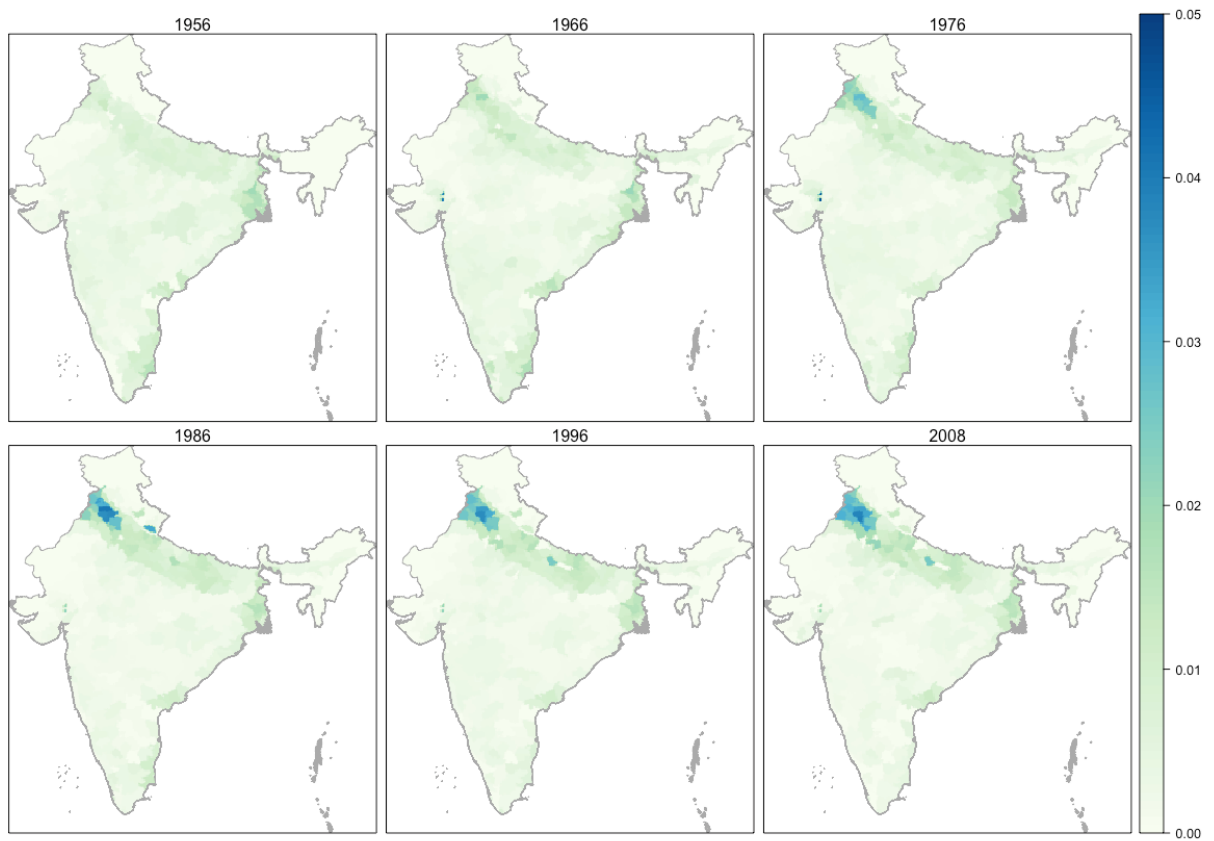

**S3 Fig.** Cereal production by district, as % of the national area, in India for select years between 1956 and 2008.
