# Supplementary material for: Agricultural intensification was associated with crop diversification in India (1947-2014)
Source: PubMed Central journal article supplement (PMC6905533; doi:10.1371/journal.pone.0225555), 2019-12-11
Supplement: pone.0225555.s006.pdf [file pone.0225555.s006.pdf]

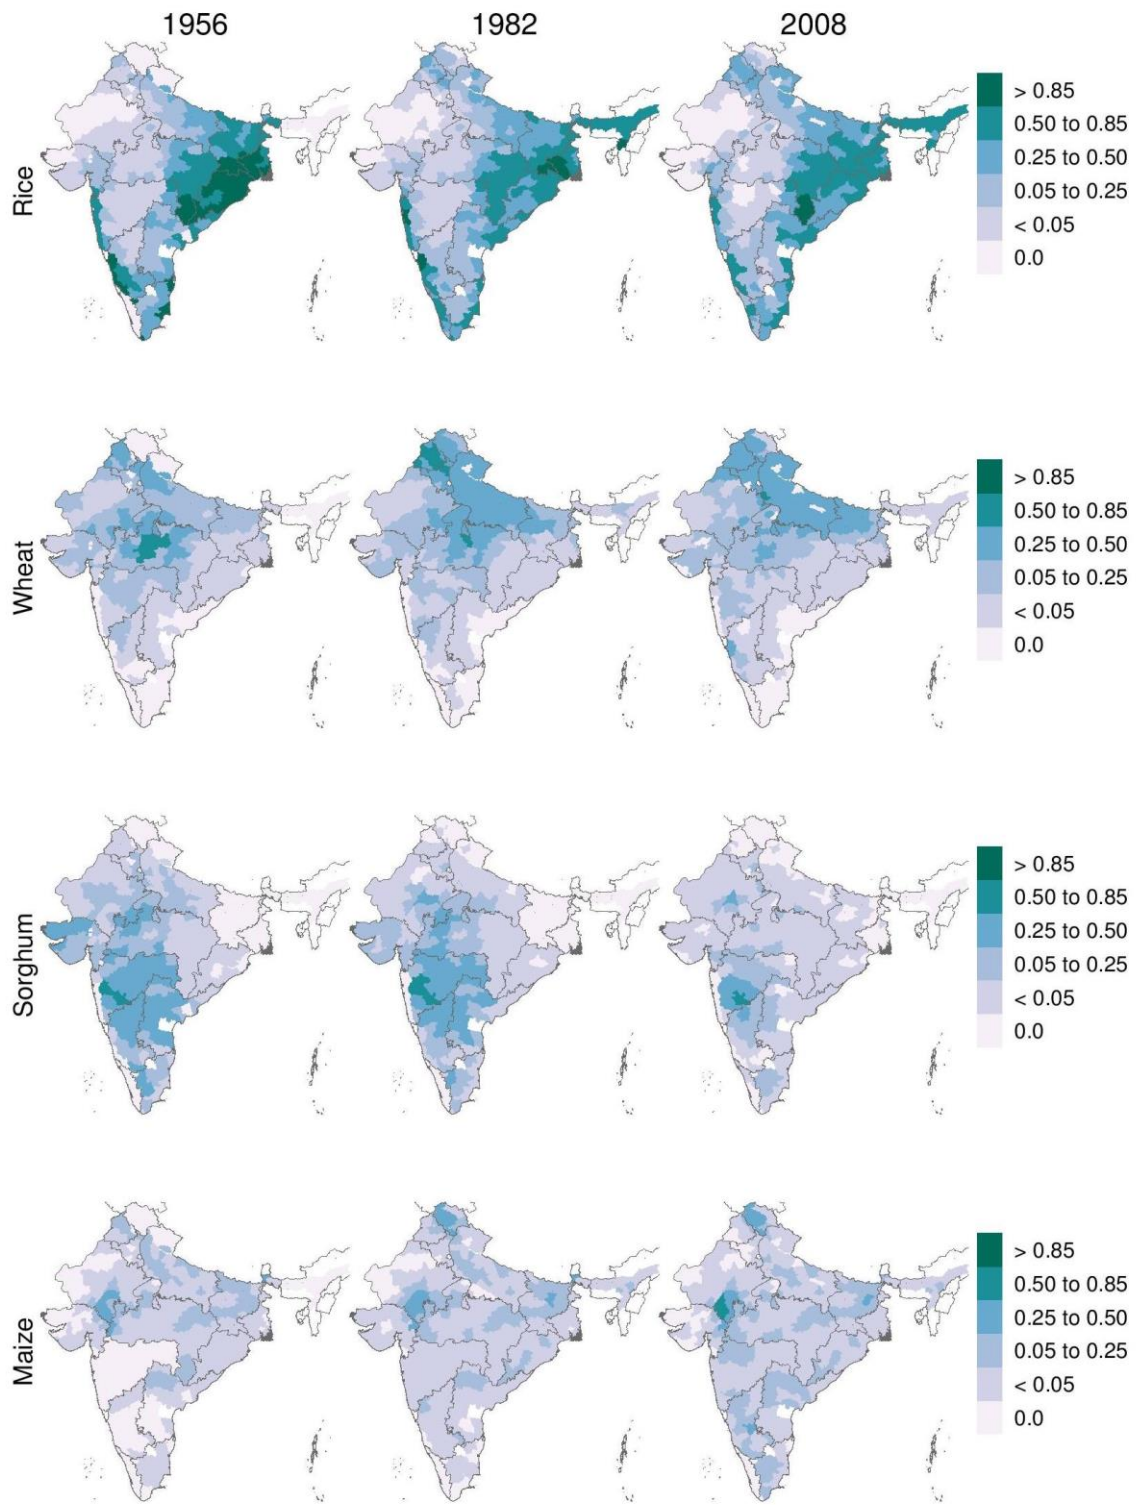

**S4 Fig (A).** Proportional area of selected crops in India in 1956, 1982, and 2008.

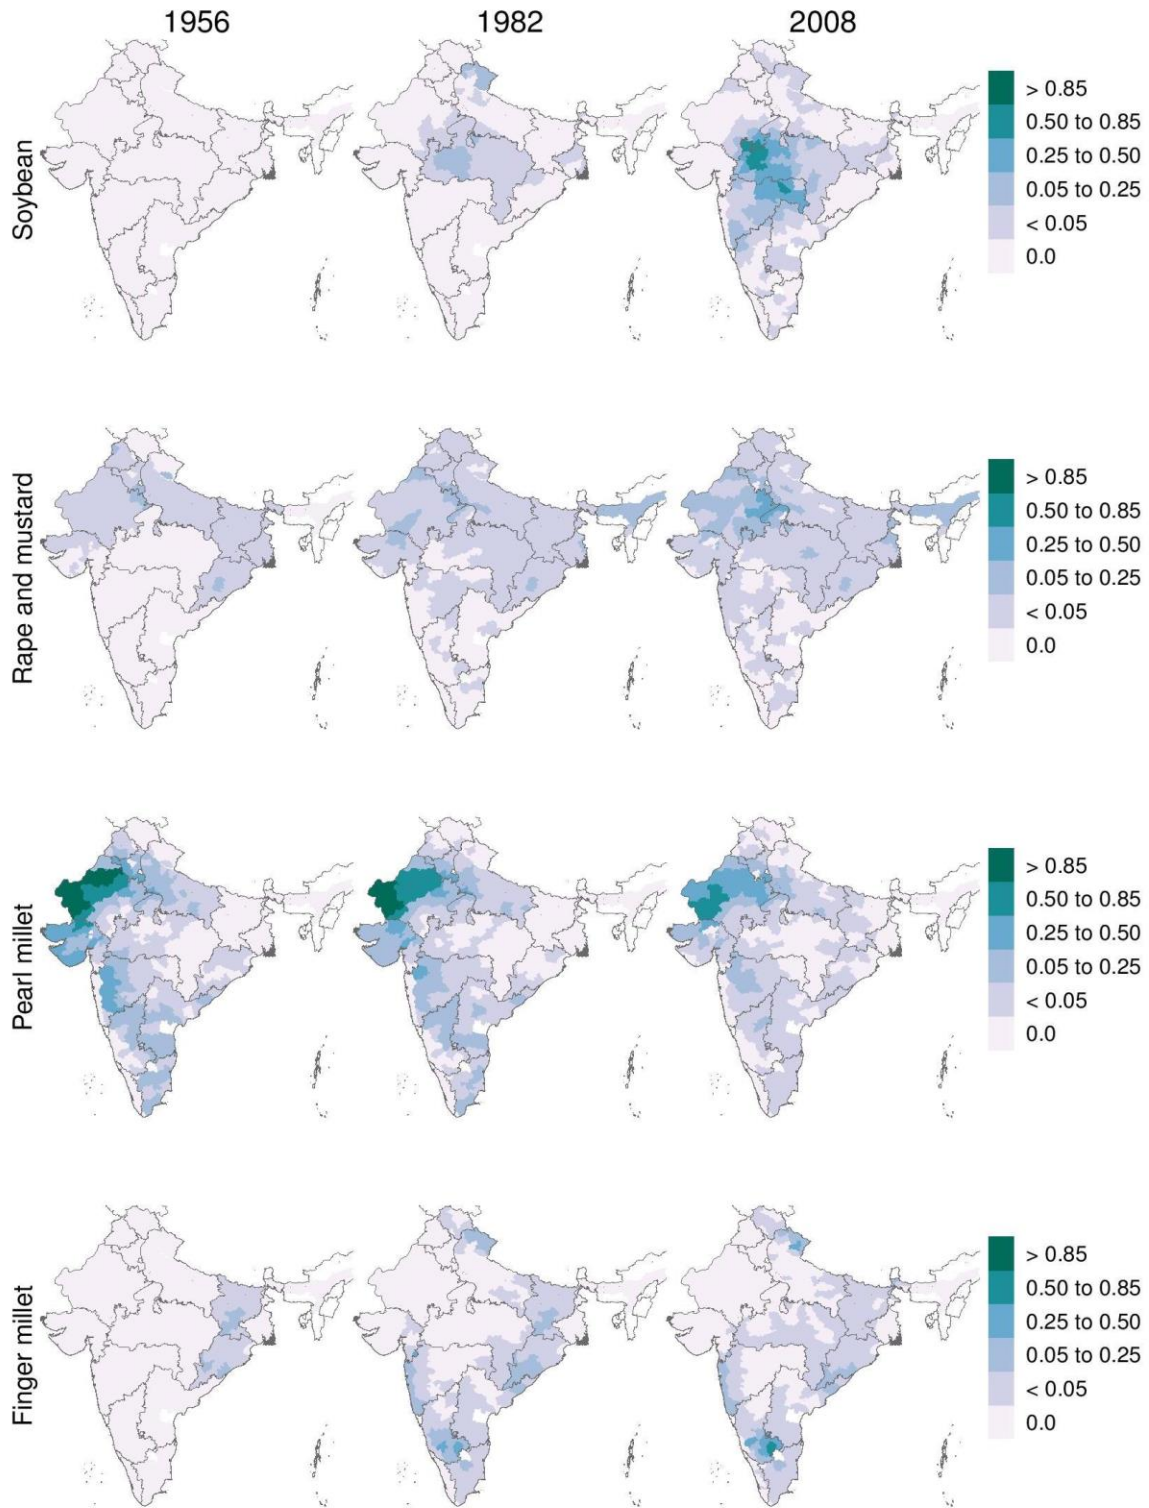

**S4 Fig (B).** Proportional area of selected crops in India in 1956, 1982, and 2008.

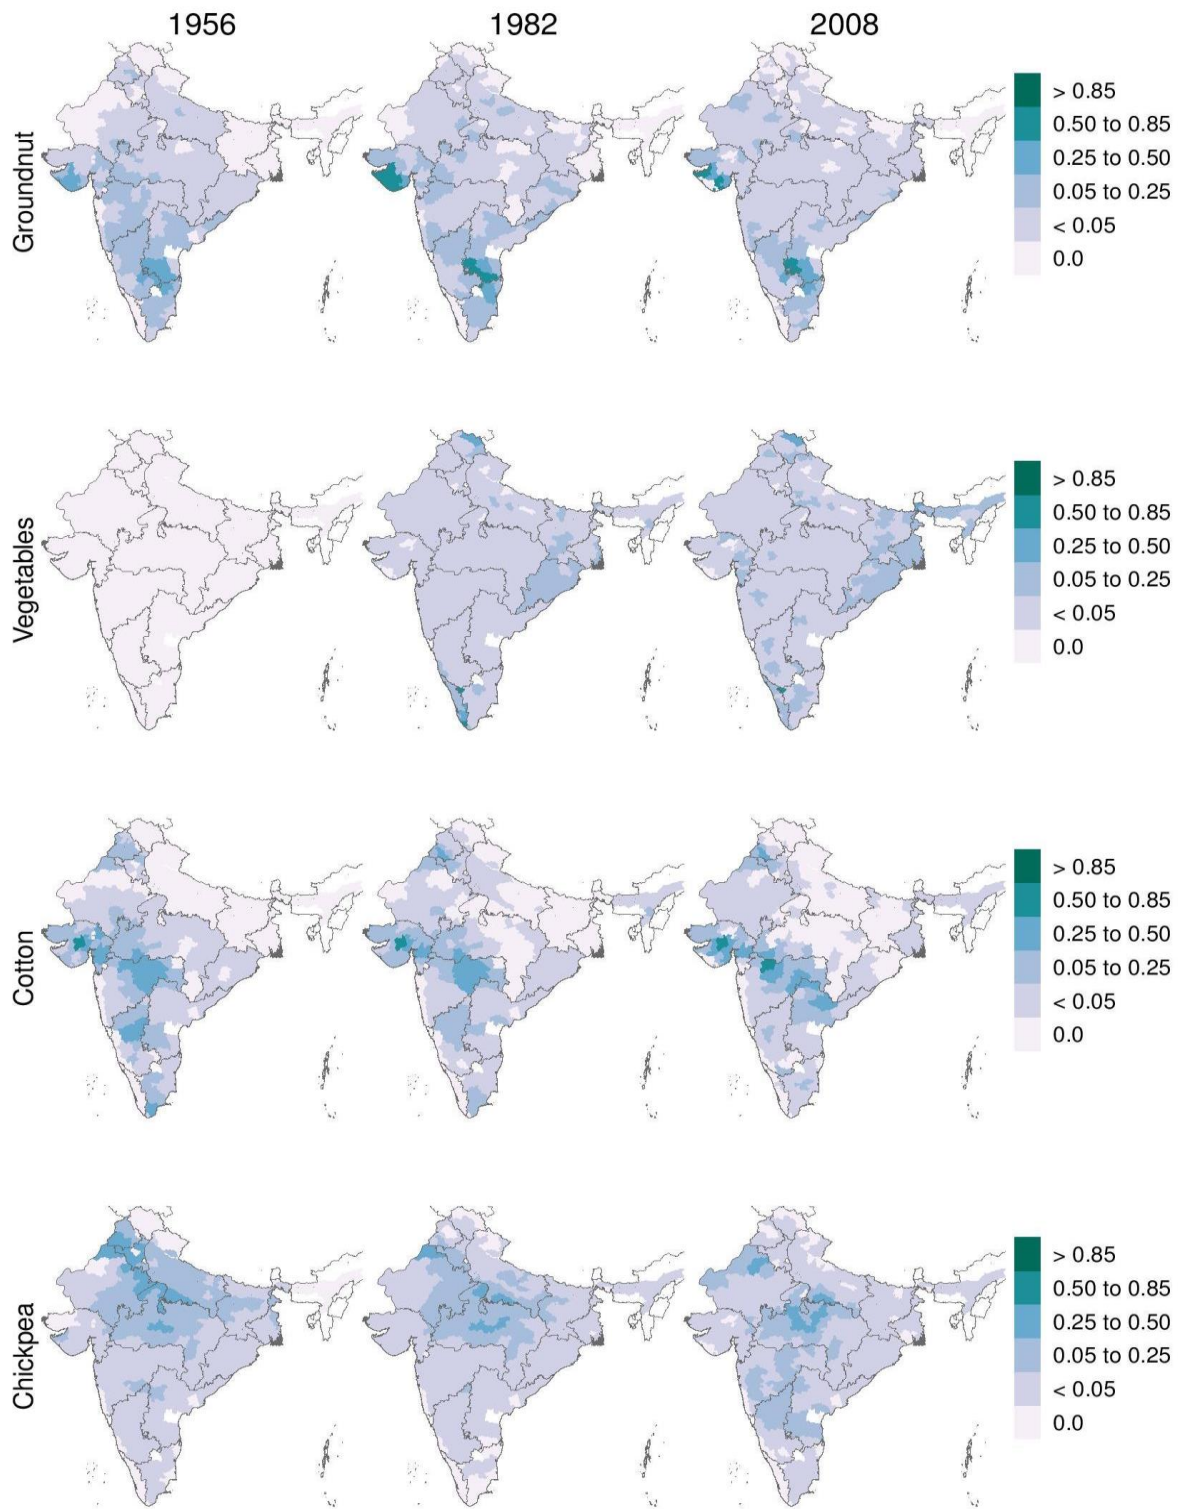

**S4 Fig (C).** Proportional area of selected crops in India in 1956, 1982, and 2008.
