# Supplementary material for: Agricultural intensification was associated with crop diversification in India (1947-2014)
Source: PubMed Central journal article supplement (PMC6905533; doi:10.1371/journal.pone.0225555), 2019-12-11
Supplement: pone.0225555.s007.pdf [file pone.0225555.s007.pdf]

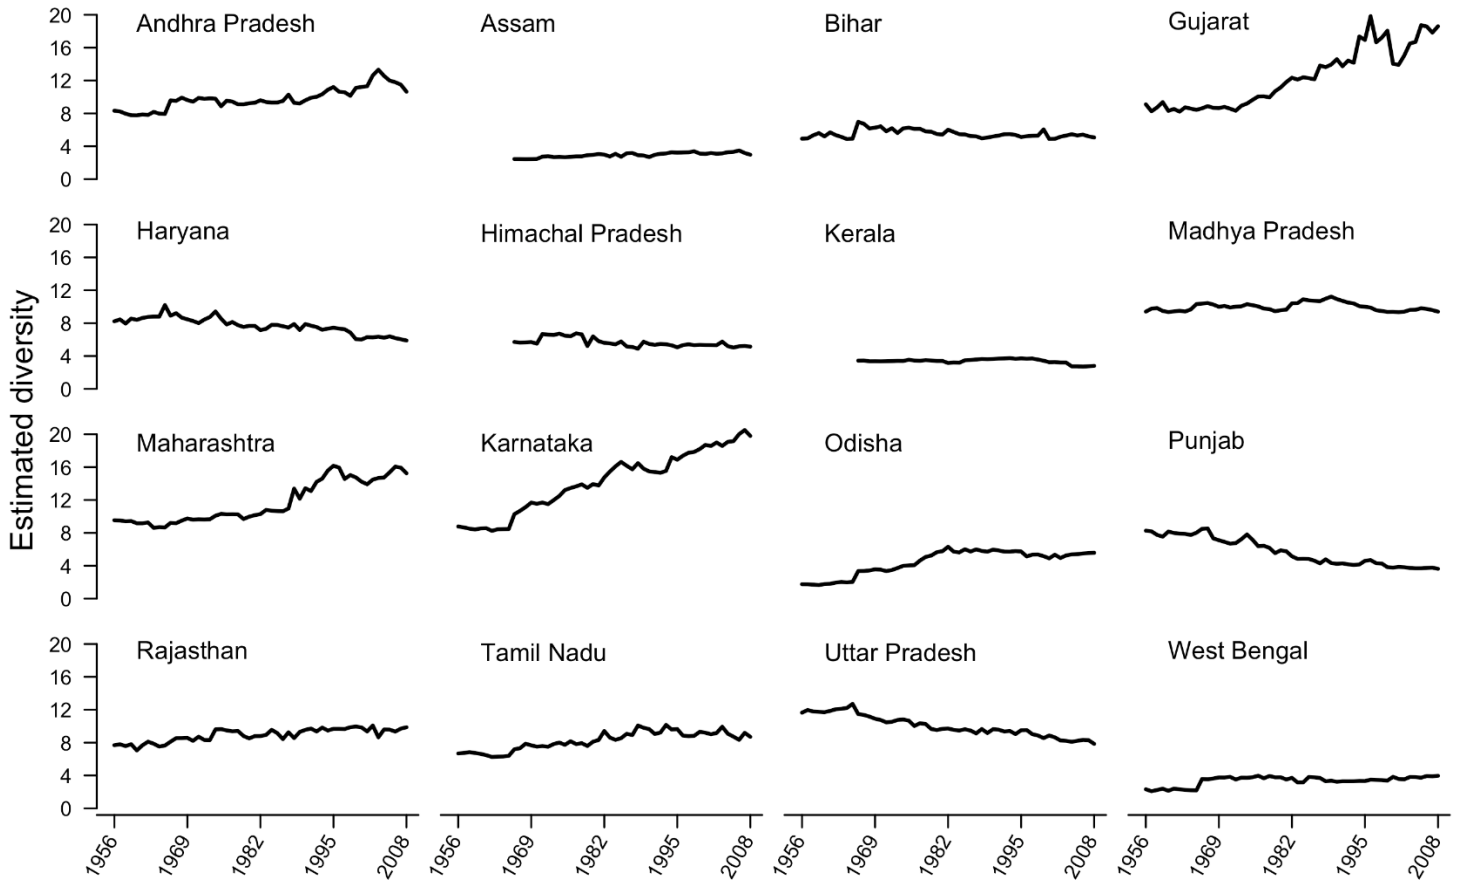

**S5 Fig.** Crop diversity in the 16 current states (1966 boundaries) included in the district level datasets for the period from 1956 to 2008.
