# Supplementary material for: Agricultural intensification was associated with crop diversification in India (1947-2014)
Source: PubMed Central journal article supplement (PMC6905533; doi:10.1371/journal.pone.0225555), 2019-12-11
Supplement: pone.0225555.s008.pdf [file pone.0225555.s008.pdf]

1

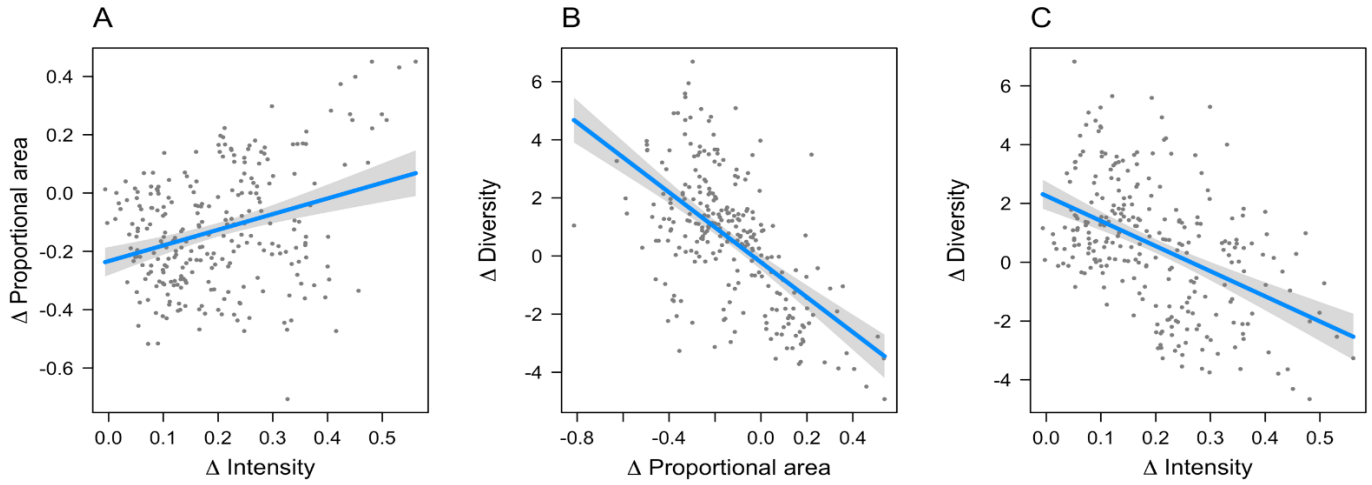

2

3 **S6 Fig.** Regression models fit to district-level data to explain changes in crop diversity in India

4 between 1956-2008 as a response to increased intensification. (A) Increase in the

5 proportion of area planted to cereals as a response to increased intensity of cereals. (B)

6 Decline in crop diversity as a response to an increase in the proportion of area planted to

7 cereals. (C) Decline in crop diversity in response to an increase in cereal yields.

8

9
